# Supplementary material
Source: HighWire-hosted journal article supplement (http://www.cfp.ca/highwire/filestream/30349/field_highwire_adjunct_files/0/Rebuttal_Eng.pdf)
Supplement: Rebuttal_Eng.pdf [file Rebuttal_Eng.pdf]

## Rebuttal: Should Canada allow direct-to-consumer advertising of prescription drugs?

### YES

Durhane Wong-Rieger PhD

Good health care means balancing risks and benefits, and patient choice means providing necessary information. Unfortunately, Dr Mintzes addresses neither the potential benefits of direct-to-consumer advertising (DTCA) nor the risks of poor access to prescription drug information. She decries DTCA as “turn[ing] doctors into gatekeepers,” yet this is precisely the role of a learned intermediary. In the US Food and Drug Administration study that I cited,<sup>1</sup> physicians reported that advertisements led to appropriate requests for information, identification of undiagnosed conditions, and higher-quality patient discussions. It is difficult to reconcile these findings with Mintzes et al’s study, which reported that physicians were “8 times more likely” to prescribe DTCA-requested medicines that they would otherwise consider “only ‘possible’ or ‘unlikely’ choices.”<sup>2</sup>

Dr Mintzes tends to use DTCA as the “whipping boy” for all her concerns about drugs, physician practice, government oversight, and manufacturer responsibility. Issues of drug toxicity, cost, efficacy of newer drugs, inappropriate prescribing, and overuse all require addressing but they exist in environments without DTCA and they will not be fixed by banning DTCA. Studies in Europe and Canada (also cited by Dr Mintzes) indicate that the public wants direct access to prescription drug information.<sup>3,4</sup> To reiterate, however, I do not propose US-style advertising, not because I take issue with ads featuring “women baring their bellies” but because we need Canadian-regulated information. Dr Mintzes suggests the Canadian government replace incoming US drug ads with “local ones,” which is similar to my proposition. But we need to get beyond the “emotive messages” that denigrate US-style advertising and allow “direct-access” information under conditions such as those proposed by the European Commission.<sup>3</sup> Health Canada has demonstrated that it can effectively regulate nonprescription drug ads; therefore, it can certainly do so for prescription drugs. ❁

**Dr Wong-Rieger** is President and CEO of the Institute for Optimizing Health Outcomes in Toronto, Ont, President of the Canadian Organization for Rare Disorders, and the founder and head of Consumer Advocare Network.

#### Competing interests

Unrestricted educational grant support from pharmaceutical companies was

*continued on next page*

### NO

Barbara Mintzes PhD

Dr Wong-Rieger argues that direct-to-consumer advertising (DTCA) should be allowed because it leads to appropriate new diagnoses and treatment, serves unmet information needs, and “made-in-Canada” DTCA can be prescreened and monitored for balance. These are oft-repeated industry claims. But does the evidence support them?

Dr Wong-Rieger cites an uncontrolled industry-funded survey to claim that DTCA leads to appropriate new diagnoses.<sup>1</sup> In this study, 11% of patients reported medically important diagnoses. Is this more, fewer, or as many as without DTCA? Was diagnosis accurate or treatment needed? With its weak design, this study cannot answer these questions. In contrast, Spence et al’s controlled survey, linked to medical records, found that those taking cyclooxygenase-2 inhibitors following DTCA-influenced requests were 3 to 4 times less likely to meet diagnostic criteria for appropriate use compared with other patients.<sup>2</sup>

Dr Wong-Rieger and I cite the same study<sup>3</sup> to support contradictory appropriateness claims. Law and colleagues found that tegaserod use increased by 42% in Canada and 56% in the United States, despite its poor safety profile.<sup>3</sup> Conversely, DTCA’s lack of effect on etanercept and mometasone use, also examined, was predictable, owing to restricted use and reimbursement differences.<sup>4</sup>

And what of unmet information needs? Advertising—direct or disguised—by definition aims to sell a product. No one can expect it to provide balanced information on all available treatment options, including competing brands, nondrug treatments, or watchful waiting. This is why consumers and public health groups oppose the European Commission’s proposal for expanded advertising (disguised as “information”) and call for publicly financed independent information instead.<sup>5</sup>

Finally, could prescreening protect consumers? The experience to date with prescreened DTCA in New Zealand and Canada stands as a stark warning that this is highly unlikely. ❁

**Dr Mintzes** is an Assistant Professor in the Department of Anesthesiology, Pharmacology & Therapeutics, a member of the Therapeutics Initiative, and a

*continued on next page*

## YES *continued from previous page*

provided to the Institute for Optimizing Health Outcomes and the Canadian Organization for Rare Disorders (CORD). The Institute for Optimizing Health Outcomes is funded through service contracts and sponsorships from the Ontario Ministry of Health and Long-Term Care and the British Columbia Ministry of Health; service contracts with health care institutions, clinics, and health services; and by unrestricted educational grants from pharmaceutical companies. The Canadian Organization for Rare Disorders receives unrestricted educational grants from pharmaceutical companies and foundations, including Alberta Gaming and Liquor Commission. The author receives no remuneration for volunteer services with CORD.

### References

1. Aikin KJ, Swasy JL, Braman AC. *Patient and physician attitudes and behaviors associated with DTC promotion of prescription drugs. Summary of FDA survey research results*. Washington, DC: Food and Drug Administration, Center for Drug Evaluation and Research; 2004. Available from: [www.fda.gov/cder/ddmac/Final%20Report/FRFinalExSu1119042.pdf](http://www.fda.gov/cder/ddmac/Final%20Report/FRFinalExSu1119042.pdf). Accessed 2008 Dec 19.
2. Mintzes B, Barer ML, Kravitz RL, Bassett K, Lexchin J, Kazanjian A, et al. How does direct-to-consumer advertising (DTCA) affect prescribing? A survey in primary care environments with and without legal DTCA. *CMAJ* 2003;169(5):405-12.
3. European Commission Enterprise and Industry Directorate-General. *Public consultation. Legal proposal on information to patients*. Brussels, BE: European Commission; 2008. Available from: [http://ec.europa.eu/enterprise/pharmaceuticals/pharmacos/docs/doc2008/2008\\_02/info\\_to\\_patients\\_consult\\_200802.pdf](http://ec.europa.eu/enterprise/pharmaceuticals/pharmacos/docs/doc2008/2008_02/info_to_patients_consult_200802.pdf). Accessed 2008 Dec 19.
4. Environics Research Group Limited. *General public favours advertising of prescription drugs, but health care professionals have strong doubts*. Toronto, ON: Environics Research Group Limited; 2002. Available from: [http://erg.environics.net/practice\\_areas/pharma/pdf/advertising\\_drugs.pdf](http://erg.environics.net/practice_areas/pharma/pdf/advertising_drugs.pdf). Accessed 2009 Jan 14.

— \* \* \* —

## NO *continued from previous page*

faculty member with the Centre for Health Services and Policy Research at the University of British Columbia in Vancouver.

### Competing interests

Dr Mintzes was a consultant to the Federal Department of Justice for the legal case in the Ontario Superior Court, in which CanWest MediaWorks challenged the prohibition of direct-to-consumer advertising of prescription drugs in the Food and Drugs Act.

### References

1. Weissman JS, Blumenthal D, Silk AJ, Newman M, Zapert K, Leitman R, et al. Physicians report on patient encounters involving direct-to-consumer advertising. *Health Aff* (Millwood) 2004;Suppl Web Exclusives:W4-219-33. Available from <http://content.healthaffairs.org/cgi/reprint/hlthaff.w4.219v1>. Accessed 2009 Jan 12.
2. Spence MM, Teleki SS, Cheetham TC, Schweitzer SO, Millares M. Direct-to-consumer advertising of COX-2 inhibitors: effect on appropriateness of prescribing. *Med Care Res Rev* 2005;62(5):544-59.
3. Law MR, Malumdar SR, Soumerai SB. Effect of illicit direct to consumer advertising on use of etanercept, mometasone, and tegaserod in Canada: controlled longitudinal study. *BMJ* 2008;337:11055.
4. Mintzes B. Direct to consumer advertising of prescription drugs. *BMJ* 2008;337:a985. DOI: 10.1136/bmj.a985.
5. European Older People's Platform, Association Internationale de la Mutualité, European AIDS Treatment Group, European Public Health Alliance, Health Action International Europe, International Society of Drug Bulletins, et al. *Joint open letter to Commissioner Vassiliou on the pharmaceutical package*. Brussels, BE: European Public Health Alliance; 2008. Available from: [www.epha.org/IMG/pdf/Open\\_joint\\_letter\\_Commissioner\\_Vassiliou\\_9\\_November\\_2008.pdf](http://www.epha.org/IMG/pdf/Open_joint_letter_Commissioner_Vassiliou_9_November_2008.pdf). Accessed 2009 Jan 14.

— \* \* \* —
